# Supplementary material for: Fluid Overload and Kidney Injury Score as a Predictor for Ventilator-Associated Events
Source: Front Pediatr. 2019 May 22;7:204. doi: 10.3389/fped.2019.00204 (PMC6538930; doi:10.3389/fped.2019.00204)
Supplement: Supplementary file 2 [file Table_2.docx]

**Supplementary material**

**Table 2. List of nephrotoxic medications included in FOKIS**

| **Nephrotoxic medication list** |
| --- |
| | Acetazolamide | | --- | | Amikacin | | Amphotericin | | Chlorothiazide | | Cisplatin | | Cyclosporine | | Ethacrynic acid | | Furosemide | | Gentamicin | | Ibuprofen | | IV Contrast | | Ketorolac | | Metolazone | | Tacrolimus | | Tobramycin | | Vancomycin | |
